# Supplementary material for: Interannual variability of ammonia concentrations over the United States:sources and implications
Source: Copernicus journal article supplement (doi:10.5194/acp-16-12305-2016), 2016-09-29
Supplement: Supplementary file [file acp-16-12305-2016-supplement.pdf]

Supplement of Atmos. Chem. Phys., 16, 12305–12328, 2016  
<http://www.atmos-chem-phys.net/16/12305/2016/>  
doi:10.5194/acp-16-12305-2016-supplement  
© Author(s) 2016. CC Attribution 3.0 License.

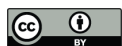

Atmospheric  
Chemistry  
and Physics  
Open Access  
EGU

*Supplement of*

## **Interannual variability of ammonia concentrations over the United States: sources and implications**

**Luke D. Schiferl et al.**

*Correspondence to:* Luke D. Schiferl (schiferl@mit.edu)

The copyright of individual parts of the supplement might differ from the CC-BY 3.0 licence.

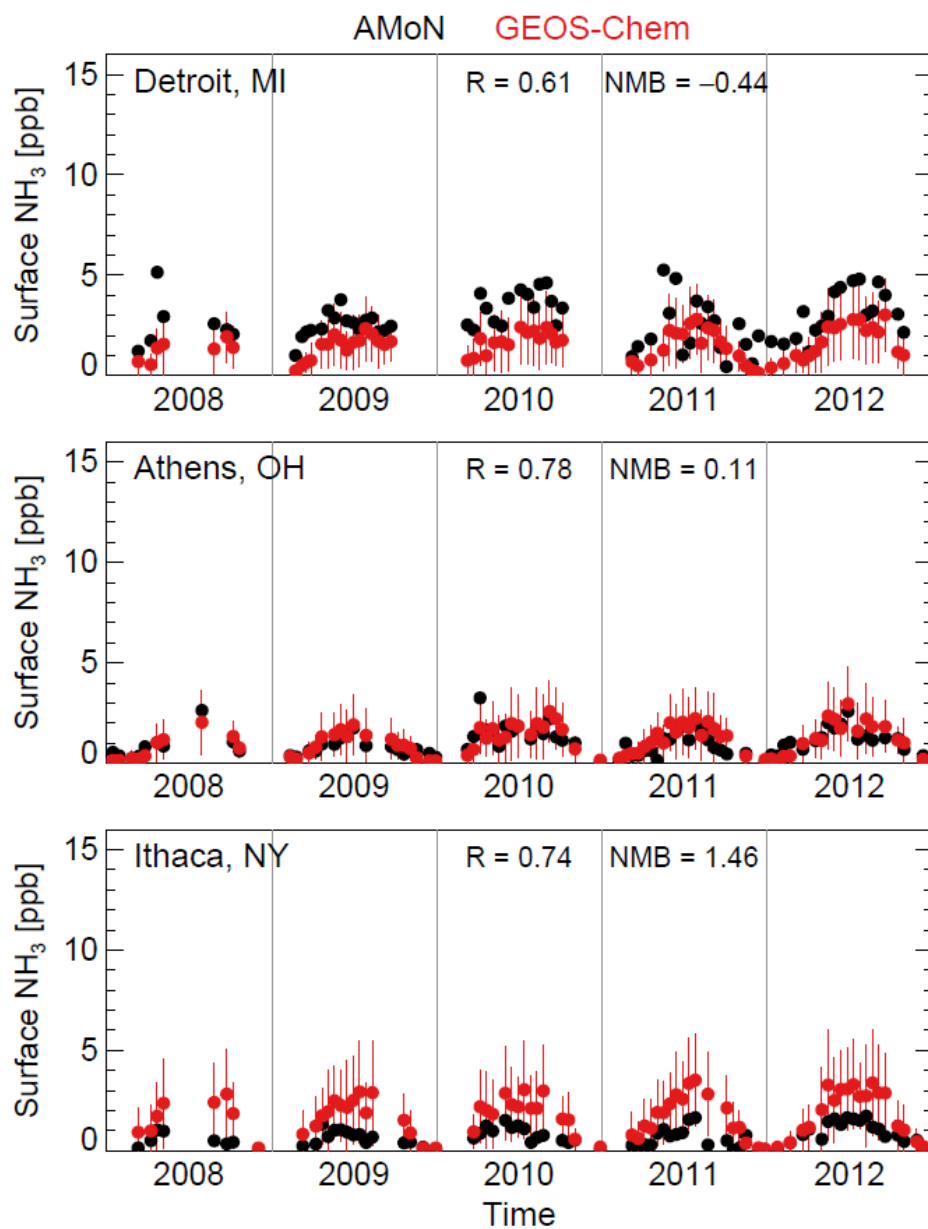

Figure S1: Same as Fig. 8, but for: Detroit, Michigan (MI) (top, urban), Athens, Ohio (OH) (middle, mixed forest / agricultural), and Ithaca, New York (NY) (bottom, mixed forest / agricultural).

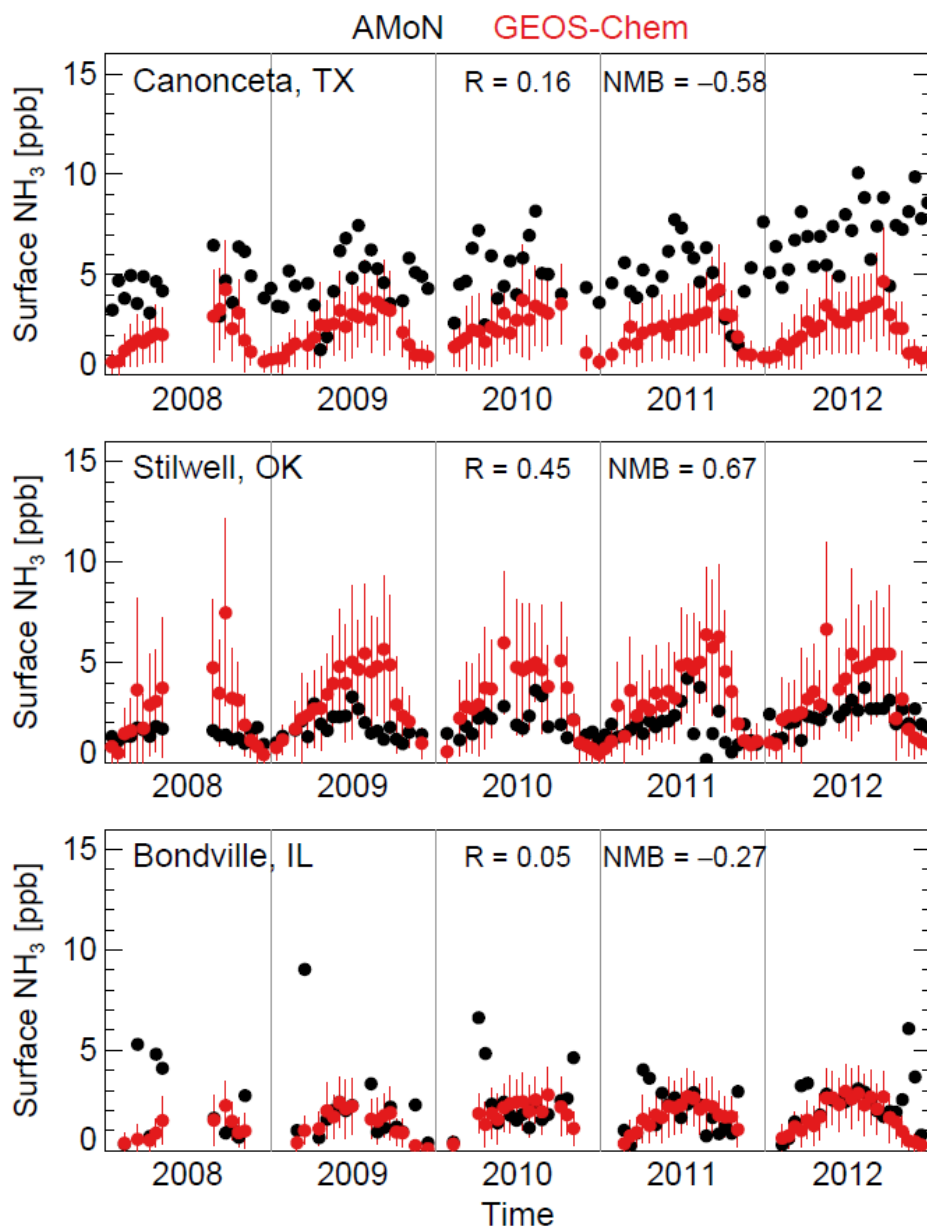

Figure S2: Same as Fig. 8, but for: Canonceta, Texas (TX) (top, agricultural), Stilwell, Oklahoma (OK) (middle, agricultural), and Bondville, Illinois (IL) (bottom, agricultural).

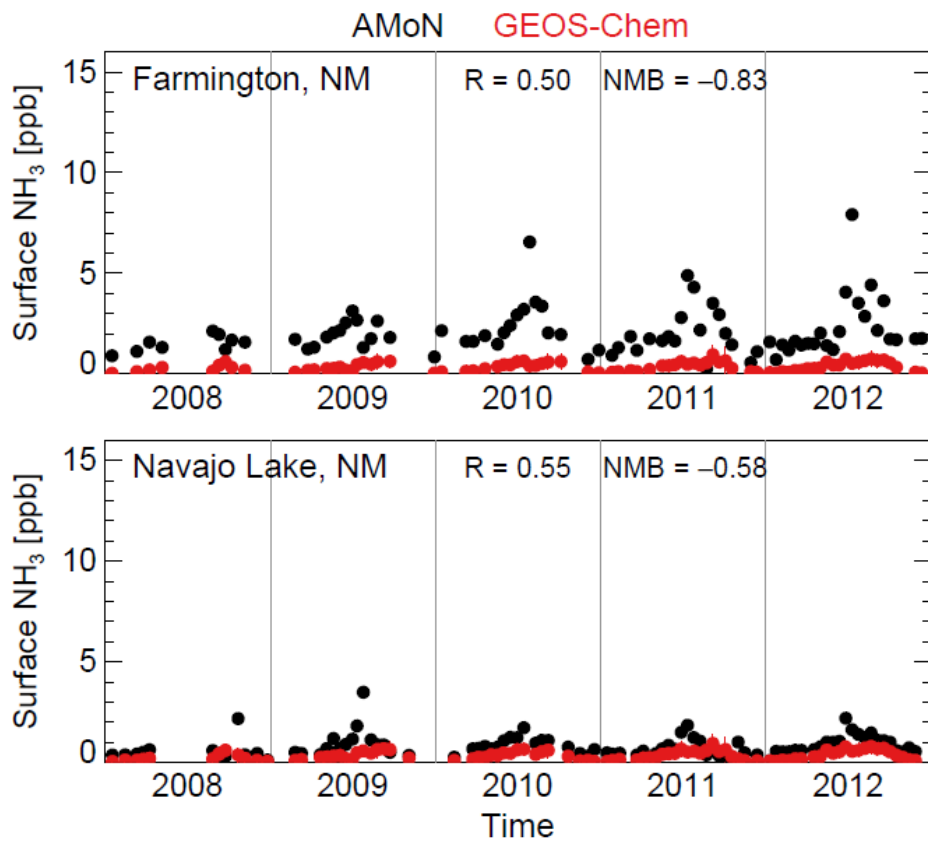

Figure S3: Same as Fig. 8, but for: Farmington, New Mexico (NM) (top, varying topography / high horizontal gradient) and Navajo Lake, NM (bottom, varying topography / high horizontal gradient).
